# Supplementary material
Source: PubMed Central journal article supplement (PMC6909237)
Supplement: ct9b00859_si_001.pdf [file ct9b00859_si_001.pdf]

# Non-adiabatic molecular dynamics on graphics processing units: performance and application to rotary molecular motors

Laurens D. M. Peters,<sup>†</sup> Jörg Kussmann,<sup>†</sup> and Christian Ochsenfeld<sup>\*,†,‡</sup>

<sup>†</sup>*Chair of Theoretical Chemistry, Department of Chemistry, University of Munich (LMU),  
Butenandtstr. 7, D-81377 München, Germany*

<sup>‡</sup>*Max Planck Institute for Solid State Research, Heisenbergstr. 1, D-70569 Stuttgart,  
Germany*

E-mail: c.ochsenfeld@fkf.mpg.de

## Contents

|          |                                                                      |          |
|----------|----------------------------------------------------------------------|----------|
| <b>1</b> | <b>Structures</b>                                                    | <b>2</b> |
| <b>2</b> | <b>Performance</b>                                                   | <b>2</b> |
| <b>3</b> | <b>Illustrative Examples</b>                                         | <b>5</b> |
| 3.1      | Validation . . . . .                                                 | 5        |
| 3.2      | Relaxed Difference Densities . . . . .                               | 8        |
| 3.3      | Excited State Gradients and Non-adiabatic Coupling Vectors . . . . . | 10       |
| 3.4      | Dihedrals . . . . .                                                  | 12       |

# 1 Structures

All optimized structures and initial conditions (structure and velocity) are available at <https://www.cup.uni-muenchen.de/pc/ochsenfeld/download/>.

# 2 Performance

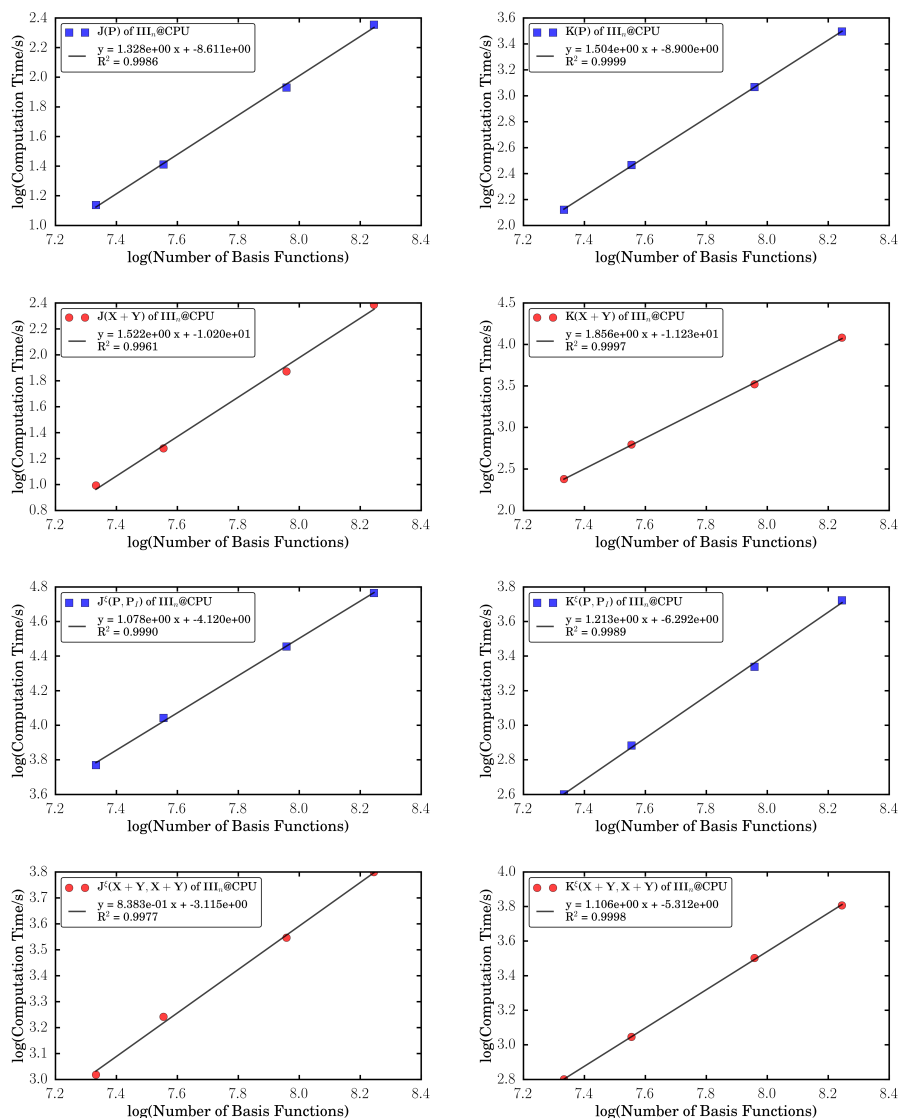

Figure S1: Log-log plot of the timings of (left) Coulomb and (right) exchange integral evaluations and their derivatives with respect to the nuclear coordinates of polyethylene (**III<sub>n</sub>**) with  $n = 40, 50, 75, 100$  calculated at PBE0/def2-SVP level of theory on CPUs. The slope of the linear fit is equal to the effective scaling behavior of the routine.

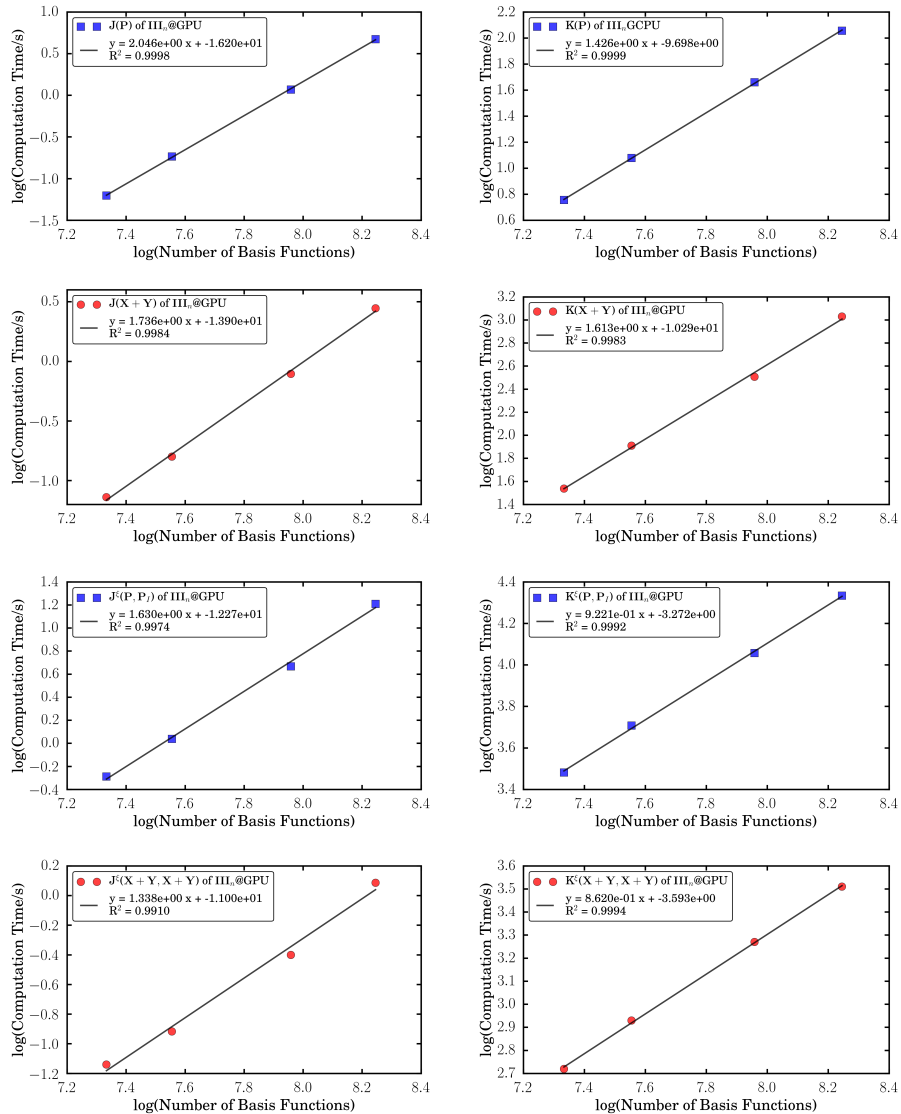

Figure S2: Log-log plot of the timings of (left) Coulomb and (right) exchange integral evaluations and their derivatives with respect to the nuclear coordinates of polyethylene ( $\text{III}_n$ ) with  $n = 40, 50, 75, 100$  calculated at PBE0/def2-SVP level of theory on GPUs. The slope of the linear fit is equal to the effective scaling behavior of the routine.

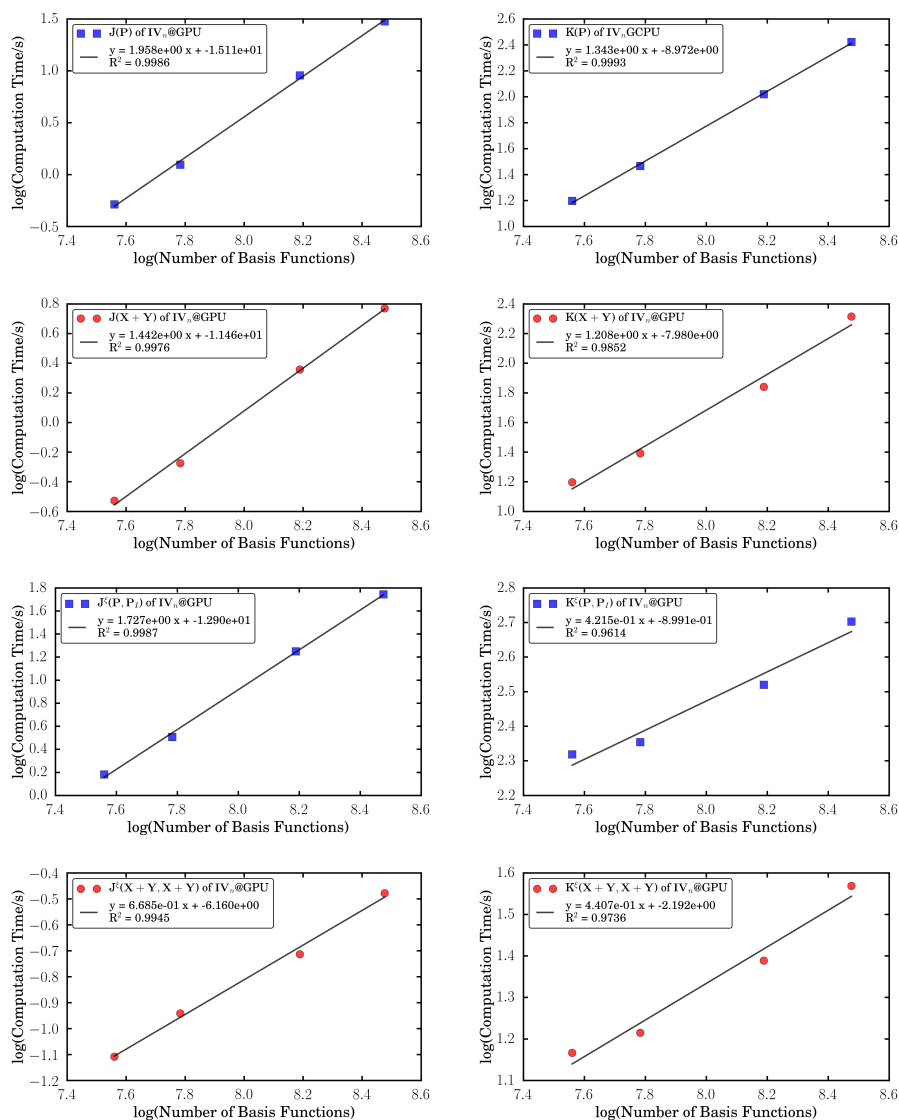

Figure S3: Log-log plot of the timings of (left) Coulomb and (right) exchange integral evaluations and their derivatives with respect to the nuclear coordinates of dialkylethene ( $\mathbf{IV}_n$ ) with  $n = 40, 50, 75, 100$  calculated at PBE0/def2-SVP level of theory on GPUs. The slope of the linear fit is equal to the effective scaling behavior of the routine.

### 3 Illustrative Examples

#### 3.1 Validation

Table 1: Mean absolute errors (MAE; in atomic units) of excited state energies ( $\omega_I$ ), gradients ( $\omega_I^\xi$ ), and non-adiabatic coupling vectors ( $\tau_{I \rightarrow J}^\xi$ ) of the four rotary molecular machines (**C**, **N**, **S**, and **O**) calculated at RPA and TDA ( $\omega$ B97/def2-SVP) level of theory on GPUs, comparing two different thresholds for preLink ( $\vartheta_{\text{pre}}$ ), the preLink gradient ( $\vartheta_{\text{pre}}^\nabla$ ), and the TDDFT convergence ( $\vartheta_{\text{TDDFT}}$ ).

| Screening Thresholds and Convergence Criteria |                                        |                       |
|-----------------------------------------------|----------------------------------------|-----------------------|
| $\vartheta_{\text{pre}}$                      | 10 <sup>-3</sup> vs 10 <sup>-4</sup>   |                       |
| $\vartheta_{\text{pre}}^\nabla$               | 10 <sup>-10</sup> vs 10 <sup>-11</sup> |                       |
| $\vartheta_{\text{TDDFT}}$                    | 10 <sup>-5</sup> vs 10 <sup>-6</sup>   |                       |
| <b>C</b>                                      |                                        |                       |
|                                               | RPA                                    | TDA                   |
| MAE( $\omega_1$ )                             | $3.19 \times 10^{-4}$                  | $6.55 \times 10^{-7}$ |
| MAE( $\omega_1^\xi$ )                         | $4.03 \times 10^{-5}$                  | $4.34 \times 10^{-6}$ |
| MAE( $\tau_{0 \rightarrow 1}^\xi$ )           | $9.89 \times 10^{-4}$                  | $2.71 \times 10^{-5}$ |
| <b>N</b>                                      |                                        |                       |
|                                               | RPA                                    | TDA                   |
| MAE( $\omega_1$ )                             | $1.98 \times 10^{-4}$                  | $2.90 \times 10^{-6}$ |
| MAE( $\omega_1^\xi$ )                         | $2.42 \times 10^{-5}$                  | $1.22 \times 10^{-5}$ |
| MAE( $\tau_{0 \rightarrow 1}^\xi$ )           | $9.43 \times 10^{-4}$                  | $6.34 \times 10^{-5}$ |
| <b>S</b>                                      |                                        |                       |
|                                               | RPA                                    | TDA                   |
| MAE( $\omega_1$ )                             | $3.91 \times 10^{-4}$                  | $1.09 \times 10^{-6}$ |
| MAE( $\omega_1^\xi$ )                         | $2.84 \times 10^{-5}$                  | $8.33 \times 10^{-6}$ |
| MAE( $\tau_{0 \rightarrow 1}^\xi$ )           | $7.85 \times 10^{-4}$                  | $4.32 \times 10^{-5}$ |
| <b>O</b>                                      |                                        |                       |
|                                               | RPA                                    | TDA                   |
| MAE( $\omega_1$ )                             | $1.94 \times 10^{-4}$                  | $9.07 \times 10^{-7}$ |
| MAE( $\omega_1^\xi$ )                         | $2.82 \times 10^{-5}$                  | $7.30 \times 10^{-6}$ |
| MAE( $\tau_{0 \rightarrow 1}^\xi$ )           | $6.35 \times 10^{-4}$                  | $3.59 \times 10^{-5}$ |

Table 2: Mean absolute errors (MAE; in atomic units) of excitation energies ( $\omega_I$ ), gradients ( $\omega_I^\xi$ ), and non-adiabatic coupling vectors ( $\tau_{I \rightarrow J}^\xi$ ) of the four rotary molecular machines (**C**, **N**, **S**, and **O**) calculated at RPA and TDA ( $\omega$ B97/def2-SVP) level of theory on GPUs, comparing RPA and TDA.

| RPA vs. TDA                         |                       |                       |                       |                       |
|-------------------------------------|-----------------------|-----------------------|-----------------------|-----------------------|
|                                     | <b>C</b>              | <b>N</b>              | <b>S</b>              | <b>O</b>              |
| MAE( $\omega_1$ )                   | $6.49 \times 10^{-3}$ | $8.17 \times 10^{-3}$ | $5.41 \times 10^{-3}$ | $6.70 \times 10^{-3}$ |
| MAE( $\omega_1^\xi$ )               | $6.43 \times 10^{-4}$ | $5.86 \times 10^{-4}$ | $5.28 \times 10^{-4}$ | $4.60 \times 10^{-4}$ |
| MAE( $\tau_{0 \rightarrow 1}^\xi$ ) | $8.73 \times 10^{-3}$ | $8.14 \times 10^{-3}$ | $8.81 \times 10^{-3}$ | $8.86 \times 10^{-3}$ |

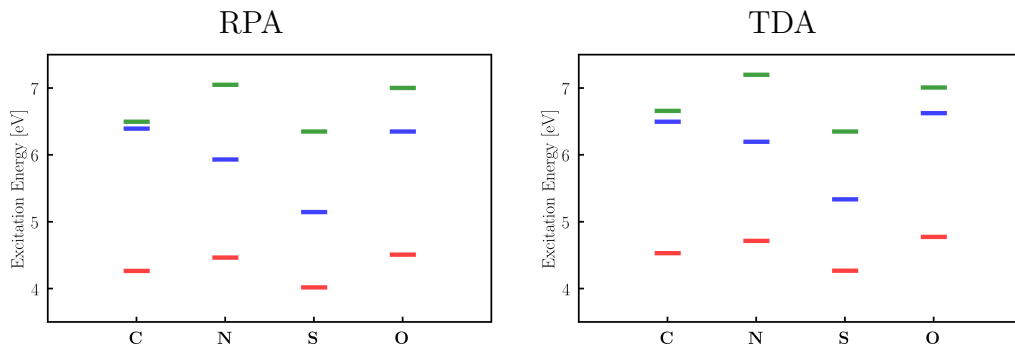

Figure S4: Excitation energies of the four rotary molecular machines (**C**, **N**, **S**, and **O**) calculated at (left) RPA and (right) TDA ( $\omega$ B97/def2-SVP) level of theory.

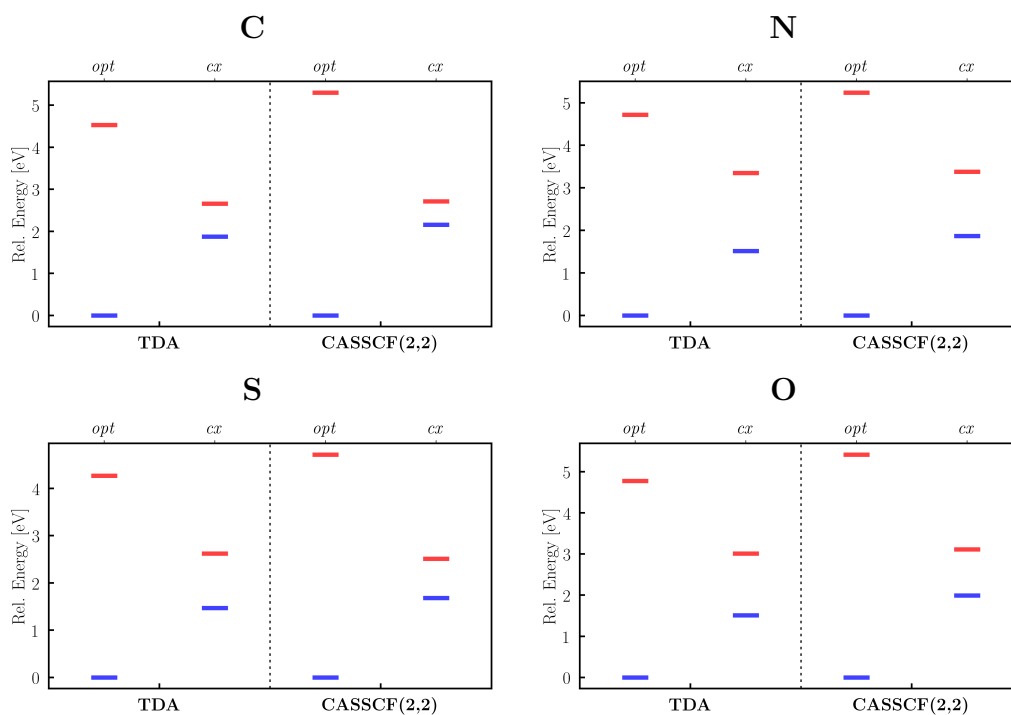

Figure S5: Comparison of relative  $S_0$  and  $S_1$  energies of the four rotary molecular machines (**C**, **N**, **S**, and **O**) calculated at TDA ( $\omega$ B97/def2-SVP) and CASSCF(2,2)/def2-SVP level of theory. The two geometries were obtained from geometry optimizations of the ground state (*opt*) and the  $S_1$  state (close to the conical intersection, *cx*) at TDA ( $\omega$ B97/def2-SVP) level of theory. CASSCF calculations were performed with ORCA v4.0 (Neese, F. The ORCA program system, *Wiley Interdiscip. Rev.: Comput. Mol. Sci.* **2012**, *2*, 73-78). TDA describes both states at *cx* and trends between the different molecular machines remarkably well.

## 3.2 Relaxed Difference Densities

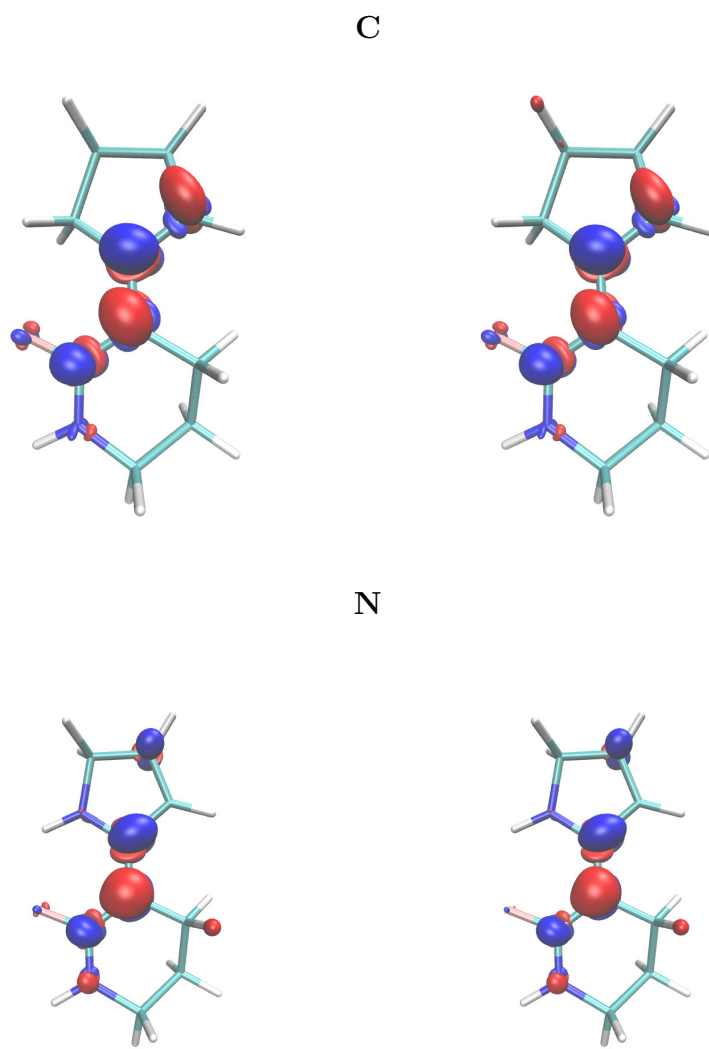

Figure S6: Plots of the relaxed difference densities of the first excited state ( $\mathbf{P}_1$ ) of (up) **C** and (down) **N** calculated at (left) RPA and (right) TDA ( $\omega$ B97/def2-SVP) level of theory.



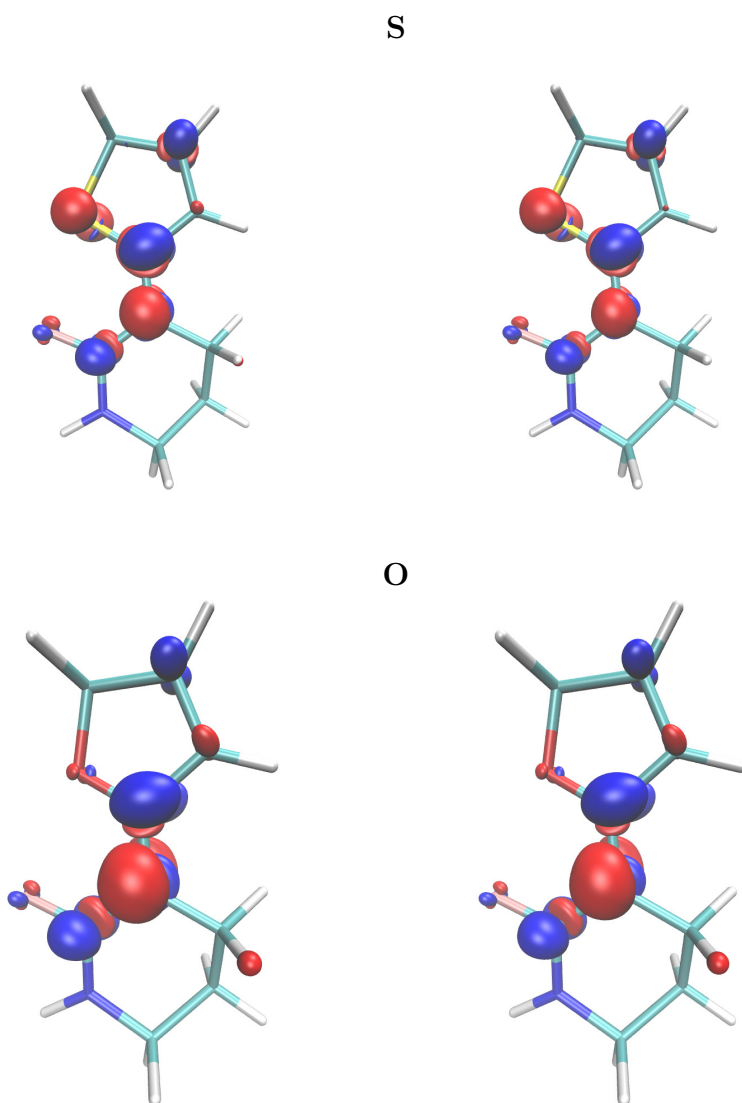

Figure S7: Plots of the relaxed difference densities of the first excited state ( $\mathbf{P}_1$ ) of (up) **S** and (down) **O** calculated at (left) RPA and (right) TDA ( $\omega$ B97/def2-SVP) level of theory.

### 3.3 Excited State Gradients and Non-adiabatic Coupling Vectors

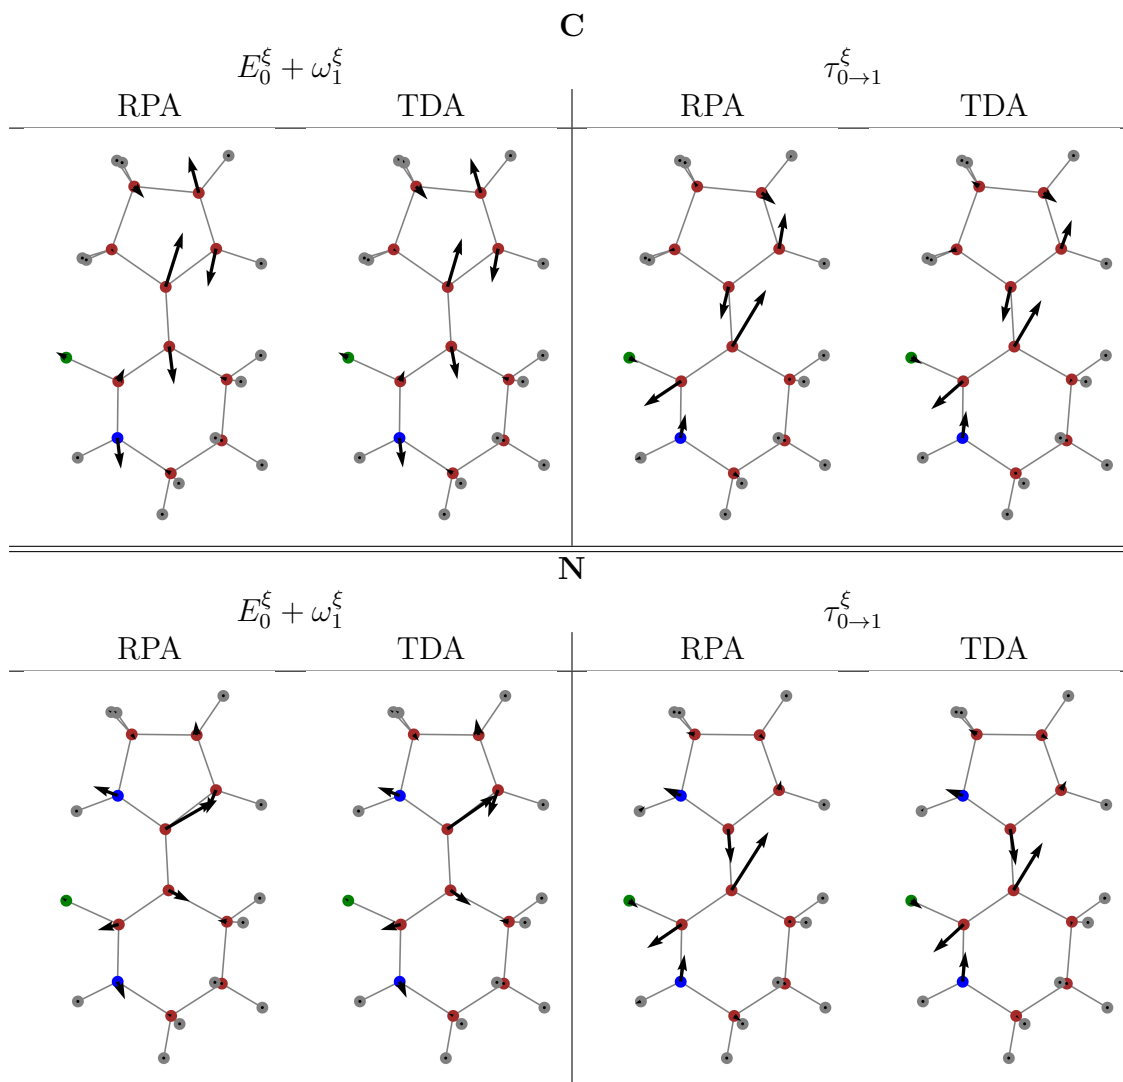

Figure S8: Excited state gradients of the first excited state ( $E_0^\xi + \omega_1^\xi$ ) and non-adiabatic coupling vectors between the ground and the first excited state ( $\tau_{0 \rightarrow 1}^\xi$ ) of (up) **C** and (down) **N** calculated at RPA and TDA ( $\omega$ B97/def2-SVP) level of theory.

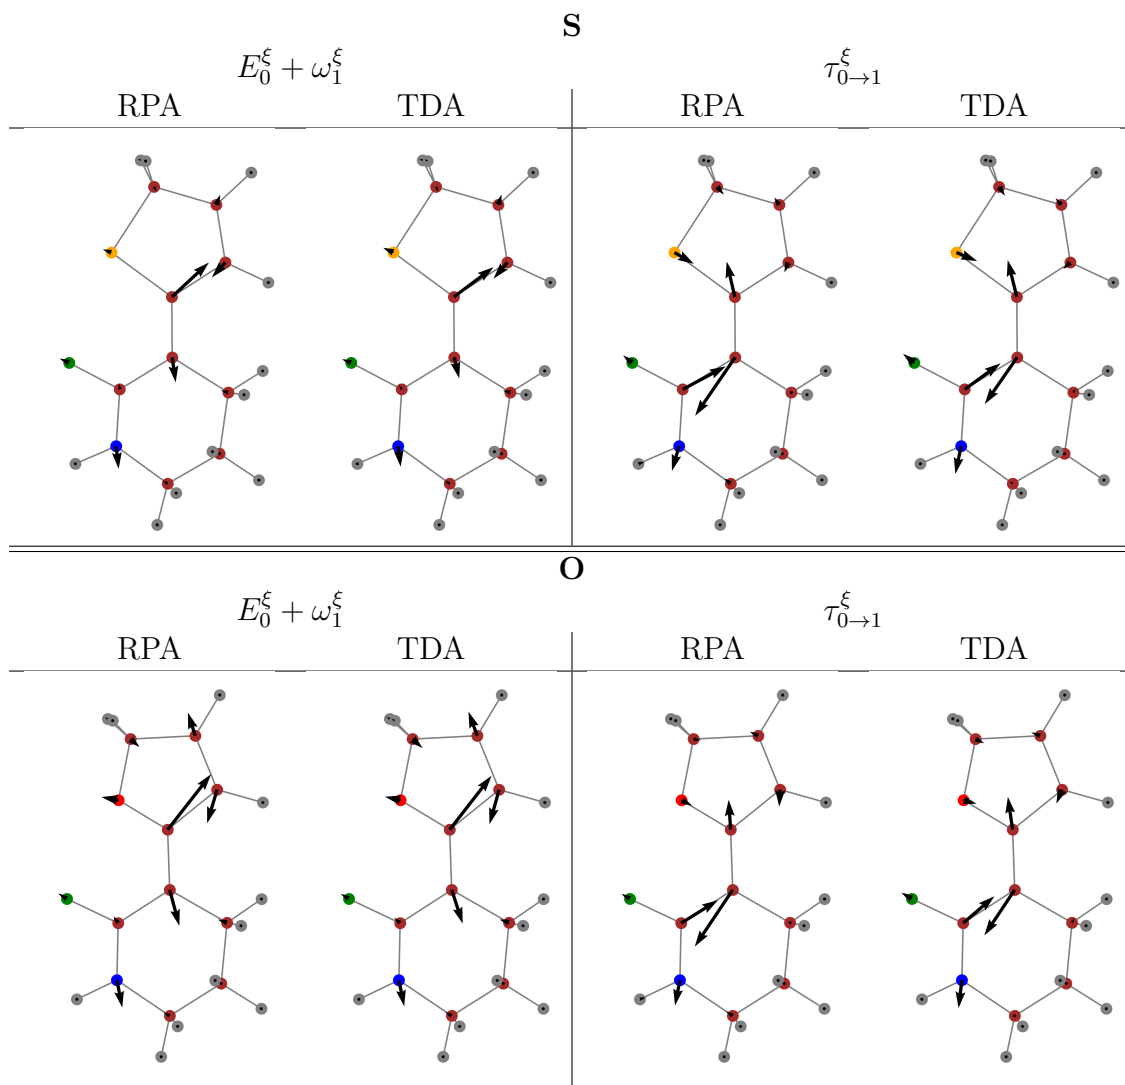

Figure S9: Excited state gradients of the first excited state ( $E_0^\xi + \omega_1^\xi$ ) and non-adiabatic coupling vectors between the ground and the first excited state ( $\tau_{0 \rightarrow 1}^\xi$ ) of (up) **S** and (down) **O** calculated at RPA and TDA ( $\omega$ B97/def2-SVP) level of theory.

### 3.4 Dihedrals

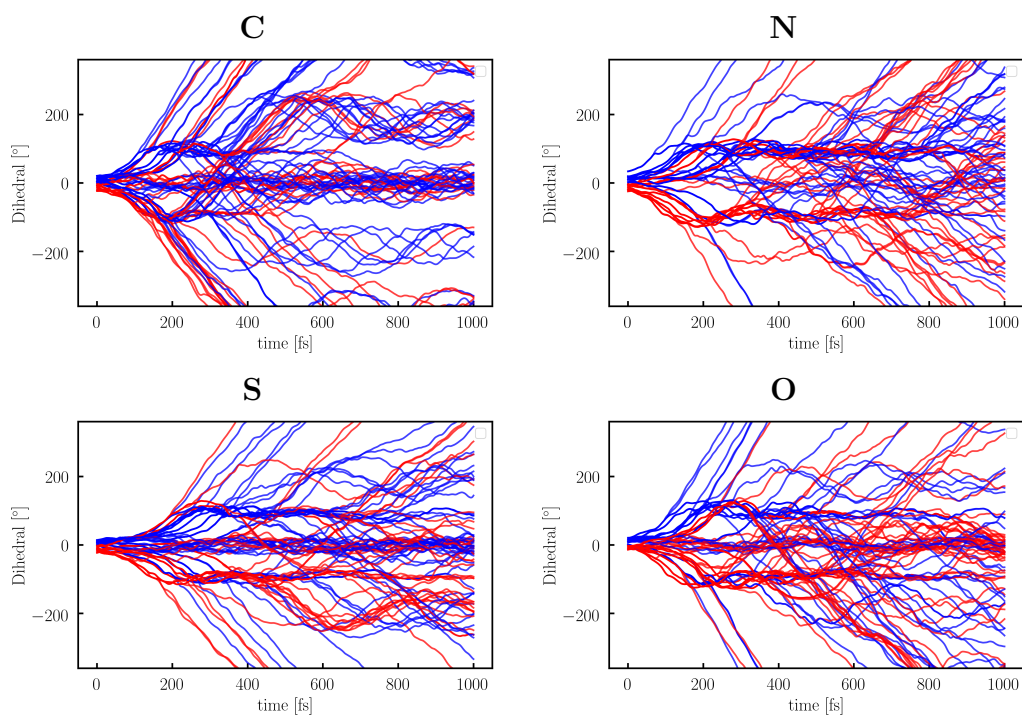

Figure S10: Dihedrals during the non-adiabatic molecular dynamics simulations of **C**, **N**, **S**, and **O**. Blue lines indicate simulations starting from a dihedral  $> 0$  and red a dihedral  $< 0$ . All rotors show no clear preference towards clockwise ( $< 0$ ) or counterclockwise ( $> 0$ ) rotations.
